# Supplementary material for: Performant Composite Materials Based on Oxide Semiconductors and Metallic Nanoparticles Generated from Cloves and Mandarin Peel Extracts
Source: PubMed Central journal article supplement (PMC7693827; doi:10.3390/nano10112146), 2020-10-28
Supplement: nanomaterials-10-02146-s001.pdf [file nanomaterials-10-02146-s001.pdf]

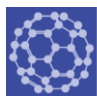

1 Supplementary Materials

# 2 Performant Composite Materials Based On Oxide

## 3 Semiconductors and Metallic Nanoparticles

### 4 Generated from Cloves and Mandarin Peel Extracts

5 **Irina Zgura** <sup>1,\*</sup>, **Monica Enculescu** <sup>1</sup>, **Cosmin Istrate** <sup>1</sup>, **Raluca Negrea** <sup>1</sup>, **Mihaela Bacalum** <sup>2</sup>, **Liviu**  
 6 **Nedelcu** <sup>1</sup> and **Marcela Elisabeta Barbinta-Patrascu** <sup>3,\*</sup>

7 <sup>1</sup> National Institute of Materials Physics, Atomistilor 405A, 077125 Magurele, Romania; mdatcu@infim.ro  
 8 (M.E.); cosmin.istrate@infim.ro (C.I.); raluca.damian@infim.ro (R.N.), nedelcu@infim.ro (L.N.)

9 <sup>2</sup> Horia Hulubei National Institute for Physics and Nuclear Engineering (IFIN-HH), Department of Life and  
 10 Environmental Physics, 077125 Bucharest-Magurele, Romania; bmihaela@nipne.ro

11 <sup>3</sup> Faculty of Physics, University of Bucharest, 405 Atomistilor Street, P.O. Box MG-11, 077125 Bucharest-  
 12 Magurele, Romania

13 \* Correspondence: irina.zgura@infim.ro (I.Z.); elipatras@gmail.com (M.E.B.-P.)

14 **Table S1.** FT-IR bands' assignment for phyto-derived materials synthesized in this study.

| Sample                          | FT-IR Bands (cm <sup>-1</sup> )              | Attribution                                                                                                                                                                      | Ref.         |
|---------------------------------|----------------------------------------------|----------------------------------------------------------------------------------------------------------------------------------------------------------------------------------|--------------|
| ZnO-CUI /<br>AgZnO-CUI          | 3209<br>(intense,<br>broad )/3192<br>(broad) | O–H bending and stretching vibrations in phenolic compounds, alcohols, and polysaccharides<br>N–H stretching vibrations (peptides and proteins)                                  | [1, 2]       |
|                                 | 1638; 1596/<br>1638; 1525                    | Amide I, due to –C=O stretch in proteins<br>Carboxylate (–COO–) groups                                                                                                           | [3, 4]       |
|                                 | 1403                                         | O–H bend (phenol or tertiary alcohol)                                                                                                                                            | [4]          |
|                                 | 1065; 982/<br>1058; 968                      | Antisymmetric stretching of C–O group of polysaccharides, alcohols                                                                                                               | [4, 5]       |
|                                 | 857/ 843                                     | Hydrogen-bonded O–H out-of-plane bending                                                                                                                                         | [4]          |
|                                 | 533/512                                      | Zn-O stretching vibration                                                                                                                                                        | [6]          |
| ZnO-<br>MAND/<br>AgZnO-<br>MAND | 3234/3268<br>(very broad<br>band)            | The hydrogen-bonded O–H (bending and stretching vibrations) groups in phenolic compounds and in polysaccharides like pectin<br>N–H stretching vibrations (peptides and proteins) | [2, 4, 7, 8] |
|                                 | 1645, 1528                                   | Carboxylate groups (–COO–) present in aminoacids or in pectin derived from mandarin peels<br>Amide I, arising from –C=O stretch in proteins                                      | [4]          |
|                                 | 1403 (weak)                                  | Phenol or tertiary alcohol, O–H bend                                                                                                                                             | [4]          |
|                                 | 1044, 975/<br>1009 (sharp<br>band)           | Stretching vibration of –C–O–C– ether linkage groups of polysaccharides (pectin<br>ν (CO), ν (CC) ring of polysaccharides (like pectin)                                          | [4, 9]       |
|                                 | 857                                          | Hydrogen-bonded O–H out-of-plane bending                                                                                                                                         | [4]          |
|                                 | 525/545<br>(sharp)                           | Zn-O stretching vibration                                                                                                                                                        | [6]          |

15

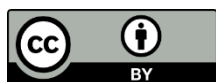

© 2020 by the authors. Submitted for possible open access publication under the terms and conditions of the Creative Commons Attribution (CC BY) license (<http://creativecommons.org/licenses/by/4.0/>).

16

1. Barbinta-Patrascu, M.E.; Badea, N.; Bacalum, M.; Ungureanu, C.; Suica-Bunghez, I.R.; Iordache, S.M.; Pirvu, C.; Zgura, I.; Maraloiu, V.A. 3D hybrid structures based on biomimetic membranes and *Caryophyllus aromaticus*—“Green” synthesized nano-silver with improved bioperformances. *Mater. Sci. Eng. C* **2019**, *101*, 120–137.
2. Estrada-Urbina, J.; Cruz-Alonso, A.; Santander-González, M.; Méndez-Albores, A.; Vázquez-Durán, A. Nanoscale Zinc Oxide Particles for Improving the Physiological and Sanitary Quality of a Mexican Landrace of Red Maize, *Nanomater.* **2018**, *8*, 247.
3. Barbinta-Patrascu, M.E.; Ungureanu, C.; Iordache, S.M.; Iordache, A.M.; Bunghez, I.R.; Ghiurea, M.; Badea, N.; Fierascu, R.C.; Stamatin, I. Eco-designed biohybrids based on liposomes, mint—nanosilver and carbon nanotubes for antioxidant and antimicrobial coating. *Mat. Sci. Eng. C* **2014**, *39*, 177–185.
4. Coates, J. *Interpretation of Infrared Spectra, a Practical Approach*. In *Encyclopedia of Analytical Chemistry*; Meyers, R.A., Eds.; John Wiley & Sons Ltd: Chichester, UK, 2000.
5. Balachandran, Y.L.; Girija, S.; Selvakumar, R.; Tongpim, S.; Gutleb, A.C.; Suriyanarayanan, S. Differently Environment Stable Bio-Silver Nanoparticles: Study on Their Optical Enhancing and Antibacterial Properties. *PLoS ONE* **2013**, *8*, e77043.
6. Jankovic, S.; Milisavic, D.; Okolic, T.; Jelic, D. Synthesis of ZnO-Ag nanoparticles by sol-gel method, *Contemporary Materials*, **2019**, *X*, 22-27.
7. Kanmani, P.; Dhivya, E.; Aravind, J.; Kumaresan, K. Extraction and Analysis of Pectin from Citrus Peels: Augmenting the Yield from Citrus limon Using Statistical Experimental Design. *Iran. J. Energy Environ.* **2014**, *5*, 303–312.
8. Barbinta-Patrascu, M. E.; Constantin, M.; Badea, N.; Ungureanu, C.; Iordache, S. M.; Purcar, V.; Antohe, S. Tangerine-generated silver-silica bioactive materials *Rom. J. Phys.* **2019**, *64*, 701.
9. Barbinta-Patrascu, M.E.; Badea, N.; Ungureanu, C.; Iordache, S.M.; Constantin, M.; Purcar, V.; Pirvu, C.; Rau, I. Eco-Biophysical Aspects on Nanosilver Bio-Generated from Citrus reticulata Peels, as Potential Bio-Pesticide for Controlling Pathogens and Wetland Plants in Aquatic Media. *J. Nanomater.* **2017**, *2017*, 4214017.
